# Supplementary material for: Privacy Choice During Crisis
Source: Atypon-hosted journal article supplement (doi:10.1287/mnsc.2022.00017), 2025-09-25
Supplement: mnsc.2022.00017.sm1.pdf [file mnsc.2022.00017.sm1.pdf]

## Appendix

### Appendix A: City-by-City Results for Figure 2

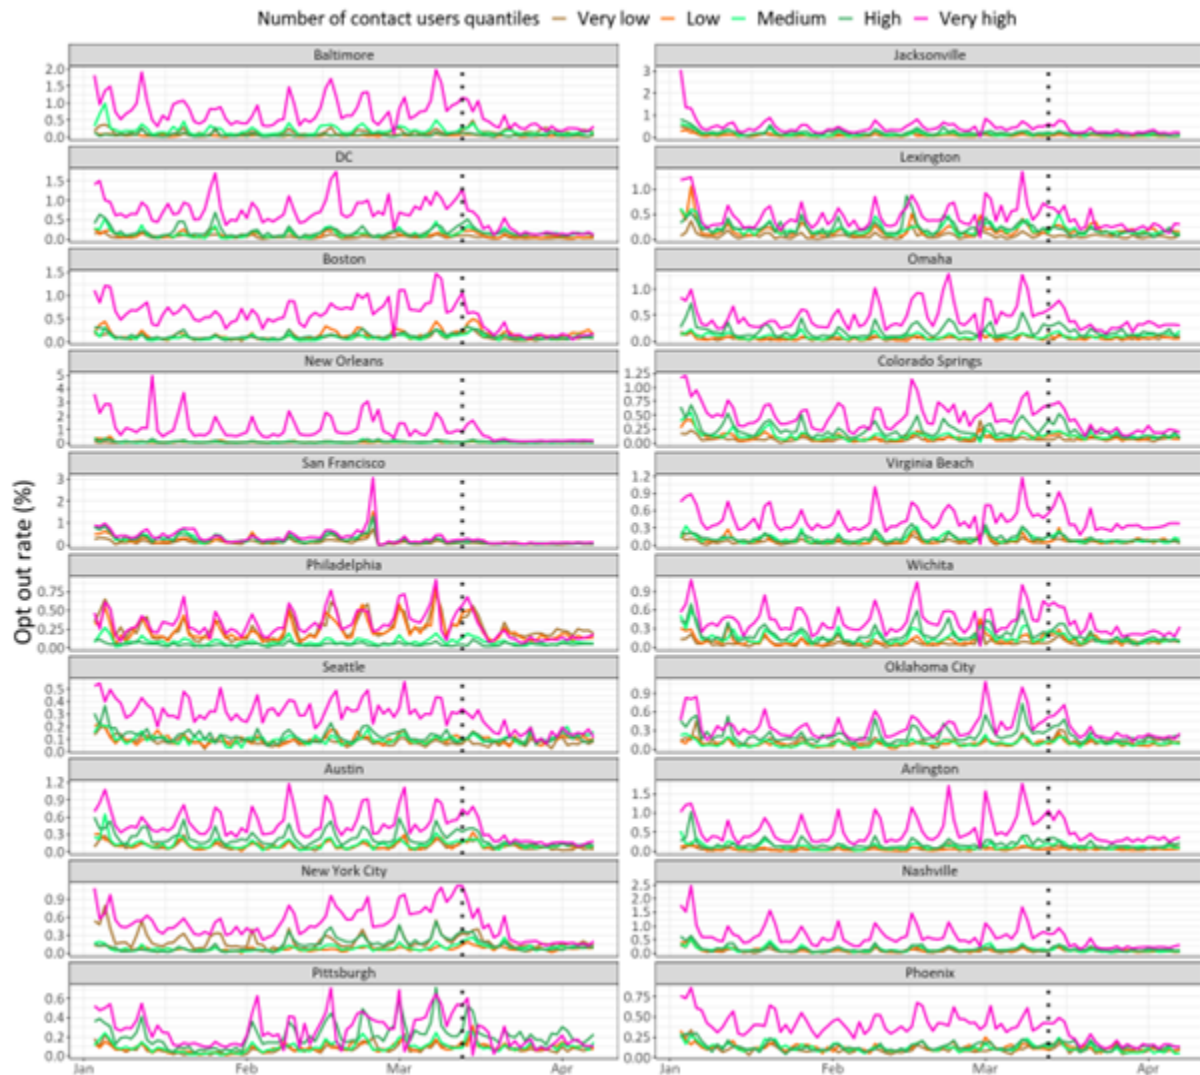

Day Trend of City-level Opt-out Rate for Different *TotalContacts* Quantiles  
 (Left, Blue cities; Right, Red cities)

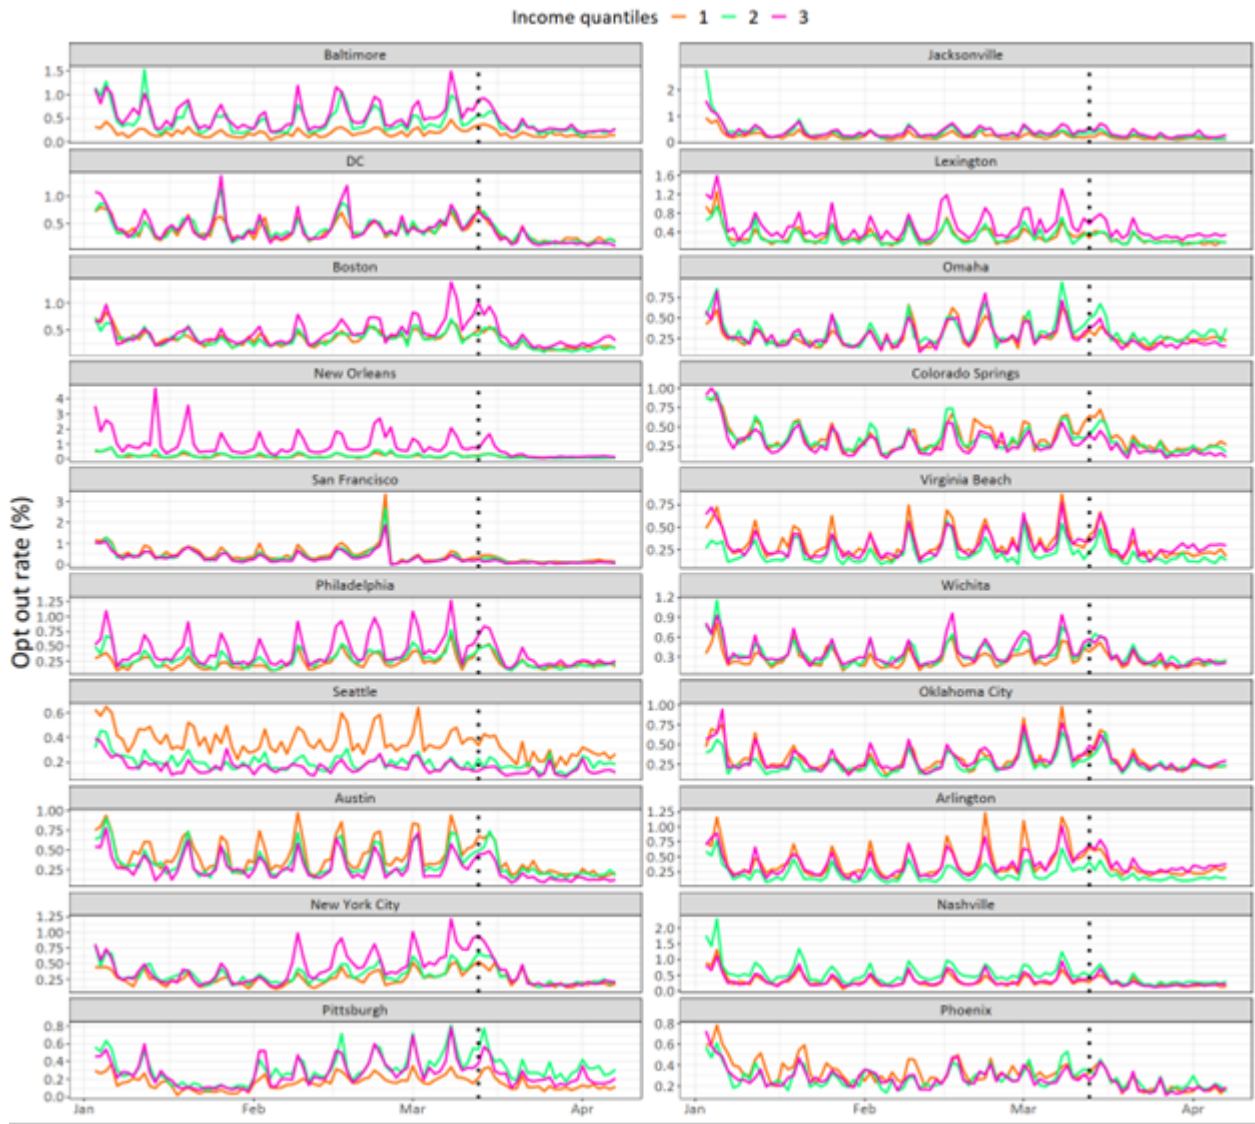

Day Trend of City-level Opt-out Rates for Different Income Quantiles  
(Left, blue cities; Right, red cities; three quantiles – from highest to lowest income)

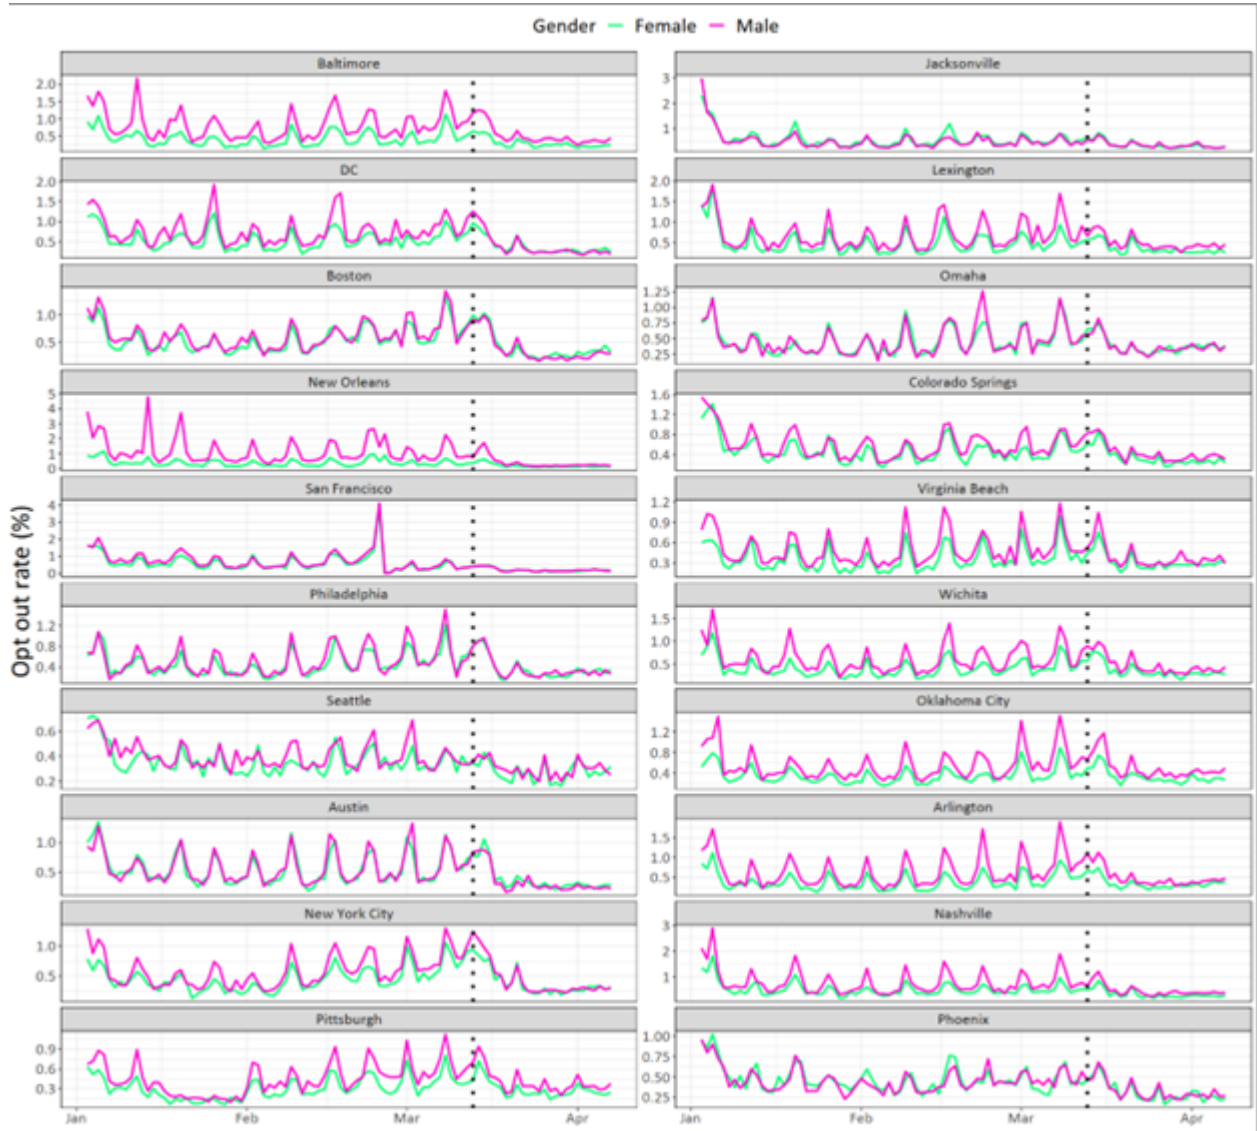

Day Trends of City-level Opt-out Rate for Males and Female  
(Left, blue cities; Right, red cities)

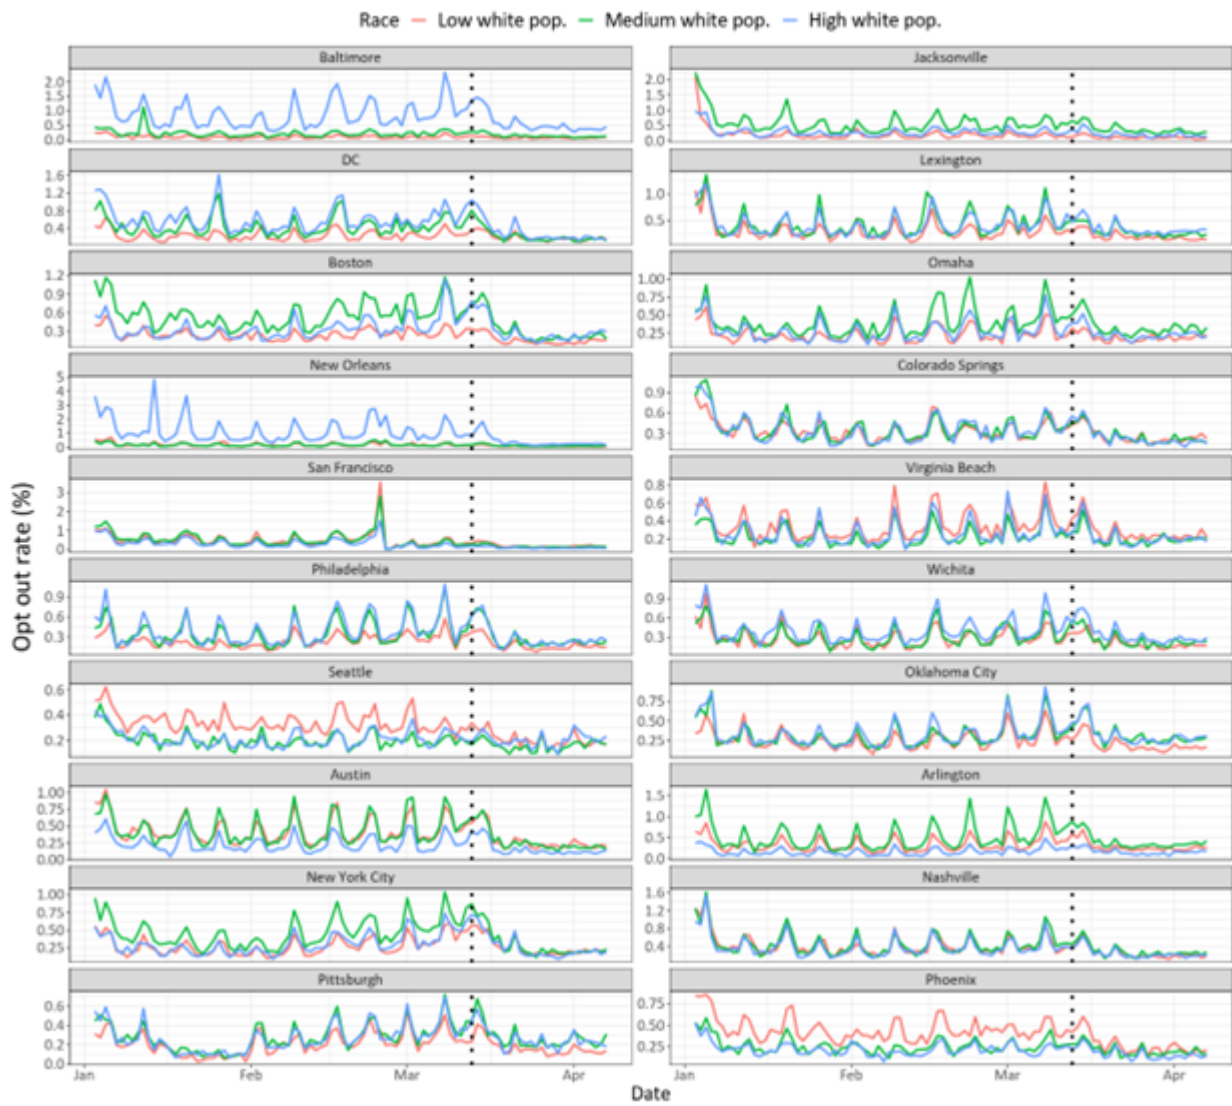

Day Trend of City-level Opt-out Rate for Different Racial Diversities  
(Left, blue cities; Right, red cities)

**Appendix B: Infection Rate and Death Rate across Blue and Red Cities**

Table B - COVID-19 Health Risks in Blue Cities versus Red Cities

|              | DV = Infection Rate  | DV = Death Rate      |
|--------------|----------------------|----------------------|
| Blue City    | 0.046****<br>(0.000) | 0.011****<br>(0.000) |
| R-squared    | 0.031                | 0.022                |
| Observations | 1,731,298            | 1,731,298            |

\*p&lt;0.10; \*\*p&lt;0.05; \*\*\*p&lt;0.01;\*\*\*\*p&lt;0.001

### Appendix D: Robustness Test with Controls for Spatially Adjacent Blocks

| City = DC                                  | (1)                   | (2)                           |
|--------------------------------------------|-----------------------|-------------------------------|
|                                            | Main Effect           | Interaction w/ Daily Contacts |
| DV = CBG <i>OptOutCount</i> (Poisson)      |                       |                               |
| Shock                                      | -0.199****<br>(0.028) | -0.322****<br>(0.030)         |
| Shock X NumContacts                        |                       | 0.145****<br>(0.012)          |
| NumContacts                                | 0.214****<br>(0.007)  | 0.173****<br>(0.007)          |
| Daily Travel Distance                      | 0.298****<br>(0.011)  | 0.289****<br>(0.011)          |
| Daily Avg. Travel Speed                    | 0.071****<br>(0.001)  | 0.072****<br>(0.001)          |
| Time Trend                                 | 0.015****<br>(0.001)  | 0.015****<br>(0.001)          |
| <i>Control Variables</i>                   |                       |                               |
| Focal Block Population                     | Yes                   | Yes                           |
| Focal Block Land Area                      | Yes                   | Yes                           |
| Focal Block Population Income              | Yes                   | Yes                           |
| Focal Block Population Gender              | Yes                   | Yes                           |
| Focal Block Population Race                | Yes                   | Yes                           |
| Focal Block Number of Existing Users       | Yes                   | Yes                           |
| Focal Block Number of Opt-in Users         | Yes                   | Yes                           |
| Focal Block Mobile App Usage               | Yes                   | Yes                           |
| 1st Closest Block Population               | Yes                   | Yes                           |
| 1st Closest Block Land Area                | Yes                   | Yes                           |
| 1st Closest Block Population Income        | Yes                   | Yes                           |
| 1st Closest Block Population Gender        | Yes                   | Yes                           |
| 1st Closest Block Population Race          | Yes                   | Yes                           |
| 1st Closest Block Number of Existing Users | Yes                   | Yes                           |
| 1st Closest Block Number of Opt-in Users   | Yes                   | Yes                           |
| 1st Closest Block Mobile App Usage         | Yes                   | Yes                           |
| 2nd Closest Block Population               | Yes                   | Yes                           |
| 2nd Closest Block Land Area                | Yes                   | Yes                           |
| 2nd Closest Block Population Income        | Yes                   | Yes                           |
| 2nd Closest Block Population Gender        | Yes                   | Yes                           |
| 2nd Closest Block Population Race          | Yes                   | Yes                           |
| 2nd Closest Block Number of Existing Users | Yes                   | Yes                           |
| 2nd Closest Block Number of Opt-in Users   | Yes                   | Yes                           |
| 2nd Closest Block Mobile App Usage         | Yes                   | Yes                           |
| 3rd Closest Block Population               | Yes                   | Yes                           |
| 3rd Closest Block Land Area                | Yes                   | Yes                           |
| 3rd Closest Block Population Income        | Yes                   | Yes                           |
| 3rd Closest Block Population Gender        | Yes                   | Yes                           |
| 3rd Closest Block Population Race          | Yes                   | Yes                           |
| 3rd Closest Block Number of Existing Users | Yes                   | Yes                           |
| 3rd Closest Block Number of Opt-in Users   | Yes                   | Yes                           |
| 3rd Closest Block Mobile App Usage         | Yes                   | Yes                           |
| Week Fixed Effect                          | Yes                   | Yes                           |
| Day of Week Fixed Effect                   | Yes                   | Yes                           |
| Log likelihood                             | -41420.74             | -41352.1                      |
| Observations                               | 84,270                | 84,270                        |

\*p<0.10; \*\*p<0.05; \*\*\*p<0.01;\*\*\*\*p<0.001

## Appendix E: Additional Falsification Test

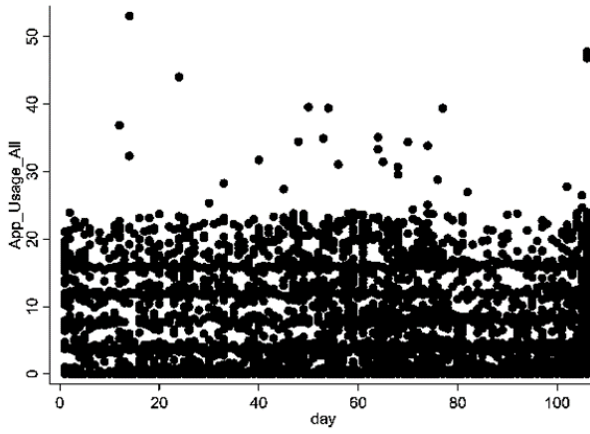

(a) Last Day of Observation

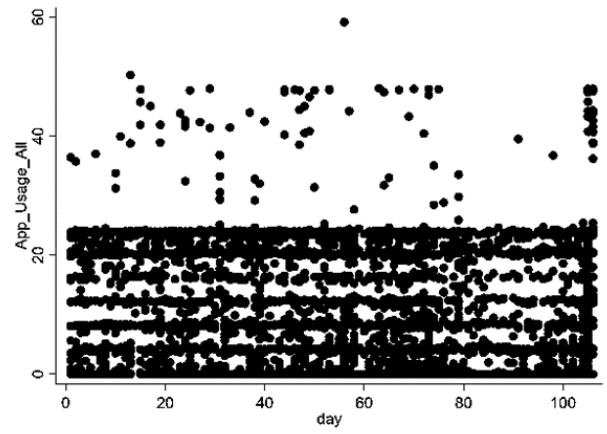

(b) 1 Day Before Last Day of Observation

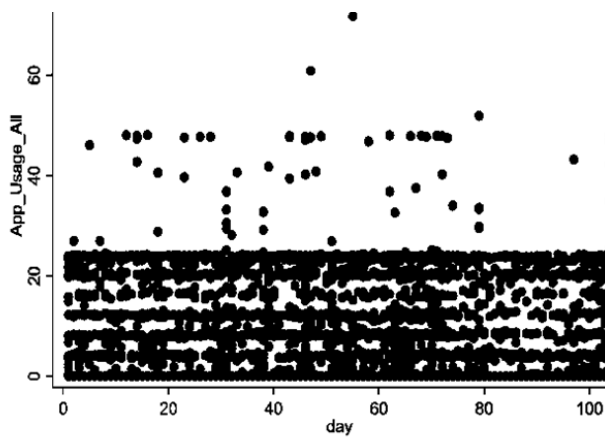

(c) 2 Days Before Last Day of Observation

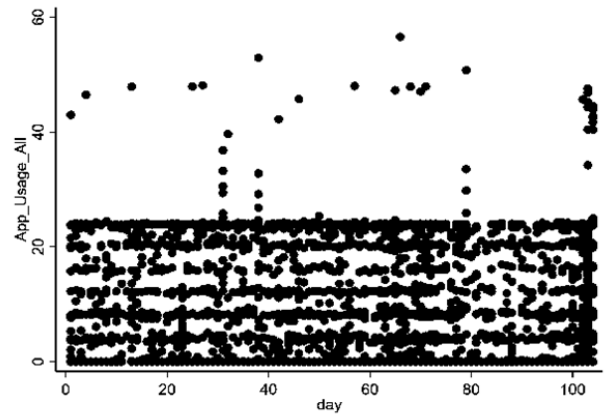

(d) 3 Days Before Last Day of Observation

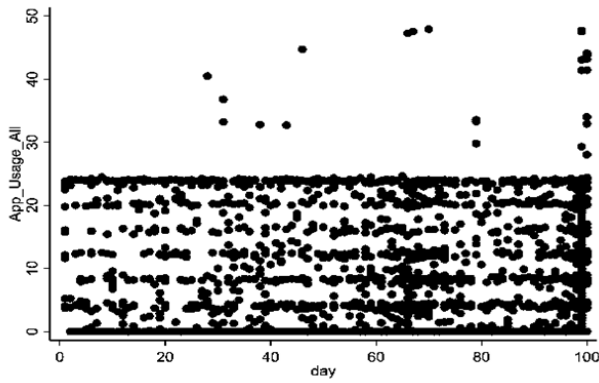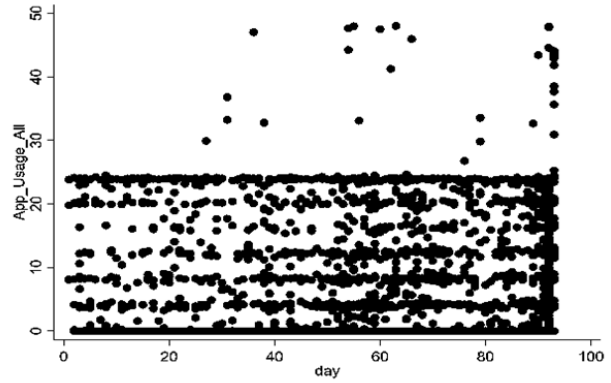

(e) 7 Days Before Last Day of Observation

(f) 14 Days Before Last Day of Observation

Distribution of *TotalAppUsage* for Each Opt-out Individuals on

(a) Zero; (b) One; (c) Two; (d) Three; (e) Seven; and (f) Fourteen Days Prior to Opt-out

Correlation between Opt-out and App Usage in Days Preceding Opt-out

|                                              | Lag 1 Day          | Lag 2 Days           | Lag 3 Days         | Lag 7 Days          |
|----------------------------------------------|--------------------|----------------------|--------------------|---------------------|
| <b>Opt-out and TotalAppUsage</b>             | 0.0024<br>(0.7142) | -0.0109<br>(0.0929)  | 0.0064<br>(0.3237) | -0.0061<br>(0.3468) |
| <b>Opt-out and Location-HeavyAppUsage</b>    | 0.0015<br>(0.8143) | -0.0137*<br>(0.0339) | 0.0094<br>(0.1445) | -0.0050<br>(0.4366) |
| <b>Opt-out and AppUsageCategory</b>          | 0.0041<br>(0.5249) | -0.0112<br>(0.0844)  | 0.0052<br>(0.4187) | -0.0074<br>(0.2537) |
| <b>Opt-out and Location-HeavyAppCategory</b> | 0.0024<br>(0.7142) | -0.0109<br>(0.0929)  | 0.0064<br>(0.3237) | -0.0061<br>(0.3468) |

\* = 5% significance level.

**Appendix F: National Emergency versus City-specific Lockdowns as Shock**

| DV = CBG <i>OptOutCount</i> (Poisson) |       |                                |                                            |                                        |
|---------------------------------------|-------|--------------------------------|--------------------------------------------|----------------------------------------|
| City                                  | State | City-specific<br>Lockdown Date | Main Effect<br>(City-specific<br>Lockdown) | Main Effect<br>(National<br>Emergency) |
| San Francisco                         | CA    | 19-Mar-20                      | -0.708****<br>(0.029)                      | -0.678****<br>(0.030)                  |
| New York City                         | NY    | 22-Mar-20                      | -0.828**<br>(0.028)                        | -0.344****<br>(0.027)                  |
| New Orleans                           | LA    | 23-Mar-20                      | -0.489****<br>(0.032)                      | -0.048*<br>(0.028)                     |
| Seattle                               | WA    | 23-Mar-20                      | 0.106****<br>(0.031)                       | -0.469****<br>(0.031)                  |
| Boston                                | MA    | 24-Mar-20                      | -0.468****<br>(0.025)                      | -0.562****<br>(0.026)                  |
| Lexington                             | KY    | 26-Mar-20                      | -0.095****<br>(0.024)                      | -0.580****<br>(0.026)                  |
| Colorado Springs                      | CO    | 26-Mar-20                      | -0.015<br>(0.025)                          | -0.678****<br>(0.026)                  |
| Oklahoma City                         | OK    | 28-Mar-20                      | -0.001<br>(0.077)                          | -0.188****<br>(0.027)                  |
| Virginia Beach                        | VA    | 30-Mar-20                      | 0.189****<br>(0.032)                       | -0.543****<br>(0.029)                  |
| Baltimore                             | MD    | 30-Mar-20                      | -0.271****<br>(0.026)                      | -0.337****<br>(0.027)                  |
| Wichita                               | KS    | 30-Mar-20                      | 0.050<br>(0.031)                           | -0.239****<br>(0.027)                  |
| Nashville                             | TN    | 31-Mar-20                      | -0.147****<br>(0.030)                      | -0.264****<br>(0.027)                  |
| Phoenix                               | AZ    | 31-Mar-20                      | -0.002<br>(0.016)                          | -0.441****<br>(0.030)                  |
| D.C.                                  | DC    | 1-Apr-20                       | -0.075***<br>(0.027)                       | -0.279****<br>(0.014)                  |
| Pittsburgh                            | PA    | 1-Apr-20                       | -0.001<br>(0.033)                          | -0.457****<br>(0.029)                  |
| Philadelphia                          | PA    | 1-Apr-20                       | -0.122****<br>(0.030)                      | -0.476****<br>(0.029)                  |
| Austin                                | TX    | 2-Apr-20                       | 0.032<br>(0.033)                           | -0.312****<br>(0.027)                  |
| Arlington                             | TX    | 2-Apr-20                       | 0.076***<br>(0.028)                        | -0.215****<br>(0.026)                  |
| Jacksonville                          | FL    | 3-Apr-20                       | 0.044<br>(0.035)                           | -0.254****<br>(0.030)                  |
| Omaha                                 | NE    | n/a#                           | -                                          | -0.392****<br>(0.028)                  |

Control variables are the same as in Table 3

\*p<0.10; \*\*p<0.05; \*\*\*p<0.01; \*\*\*\*p<0.001

# Nebraska never orders residents to stay home.

Results are based on the main analyses using Poisson Model. We have also run the same analyses using Negative Binomial Model and the results remain highly consistent.

We notice that the main effects are positive for Arlington and Virginia Beach, likely because the

lockdown orders in those two states (TX and VA) were issued relatively late (4/2 and 3/30, 2020). We do not have enough daily observations to fully observe the post-shock trend, as 4/15/2020 is the last day of our sample. The main effect is also positive for Seattle, calling for future research.

**Appendix G: City-by-City Results**

Tables G - Heterogeneous Effect of Policy Compliance on Privacy Choice for each City (DV and model are the same as in Table 4)

| 1 - Boston                               |                       |                               |
|------------------------------------------|-----------------------|-------------------------------|
| City = Boston                            | (1)                   | (2)                           |
| DV = <i>Individual OptOut</i> (Logit)    | Main Effect           | Interaction w/ Daily Contacts |
| Shock                                    | -0.562****<br>(0.026) | -0.615****<br>(0.028)         |
| Shock x<br>NumContacts                   |                       | 0.063****<br>(0.012)          |
| NumContacts                              | 0.310****<br>(0.007)  | 0.289****<br>(0.008)          |
| Controls                                 | Yes                   | Yes                           |
| Observations                             | 97,308                | 97,308                        |
| *p<0.10; **p<0.05; ***p<0.01;****p<0.001 |                       |                               |
| 2 - D.C.                                 |                       |                               |
| City = D.c.                              | (1)                   | (2)                           |
| DV = <i>Individual OptOut</i> (Logit)    | Main Effect           | Interaction w/ Daily Contacts |
| Shock                                    | -0.262****<br>(0.028) | -0.416****<br>(0.029)         |
| Shock x<br>NumContacts                   |                       | 0.219****<br>(0.012)          |
| NumContacts                              | 0.265****<br>(0.006)  | 0.206****<br>(0.007)          |
| Controls                                 | Yes                   | Yes                           |
| Observations                             | 84,270                | 84,270                        |
| *p<0.10; **p<0.05; ***p<0.01;****p<0.001 |                       |                               |
| 3 - Baltimore                            |                       |                               |
| City = Baltimore                         | (1)                   | (2)                           |
| DV = <i>Individual OptOut</i> (Logit)    | Main Effect           | Interaction w/ Daily Contacts |
| Shock                                    | -0.337****<br>(0.027) | -0.520****<br>(0.029)         |
| Shock x<br>NumContacts                   |                       | 0.248****<br>(0.015)          |
| NumContacts                              | 0.257****<br>(0.008)  | 0.169****<br>(0.010)          |
| Controls                                 | Yes                   | Yes                           |
| Observations                             | 71,126                | 71,126                        |
| *p<0.10; **p<0.05; ***p<0.01;****p<0.001 |                       |                               |

4 - Lexington

| City = Lexington                      | (1)                   | (2)                           |
|---------------------------------------|-----------------------|-------------------------------|
| DV = <i>Individual OptOut</i> (Logit) | Main Effect           | Interaction w/ Daily Contacts |
| Shock                                 | -0.580****<br>(0.026) | -0.936****<br>(0.031)         |
| Shock x<br>NumContacts                |                       | 0.203****<br>(0.009)          |
| NumContacts                           | 0.259****<br>(0.006)  | 0.153****<br>(0.007)          |
| Controls                              | Yes                   | Yes                           |
| Observations                          | 26,500                | 26,500                        |

\*p<0.10; \*\*p<0.05; \*\*\*p<0.01;\*\*\*\*p<0.001

5 - Colorado Spring

| City = Colorado Spring                | (1)                   | (2)                           |
|---------------------------------------|-----------------------|-------------------------------|
| DV = <i>Individual OptOut</i> (Logit) | Main Effect           | Interaction w/ Daily Contacts |
| Shock                                 | -0.678****<br>(0.026) | 0.046<br>(0.038)              |
| Shock x<br>NumContacts                |                       | -0.216****<br>(0.008)         |
| NumContacts                           | 0.192****<br>(0.005)  | 0.319****<br>(0.007)          |
| Controls                              | Yes                   | Yes                           |
| Observations                          | 33,496                | 33,496                        |

\*p<0.10; \*\*p<0.05; \*\*\*p<0.01;\*\*\*\*p<0.001

6 - Virginia Beach

| City = Virginia Beach                 | (1)                   | (2)                           |
|---------------------------------------|-----------------------|-------------------------------|
| DV = <i>Individual OptOut</i> (Logit) | Main Effect           | Interaction w/ Daily Contacts |
| Shock                                 | -0.491****<br>(0.029) | -0.887****<br>(0.039)         |
| Shock x<br>NumContacts                |                       | 0.127****<br>(0.008)          |
| NumContacts                           | 0.391****<br>(0.006)  | 0.320****<br>(0.007)          |
| Controls                              | Yes                   | Yes                           |
| Observations                          | 30,422                | 30,422                        |

\*p<0.10; \*\*p<0.05; \*\*\*p<0.01;\*\*\*\*p<0.001

7 - San Francisco

| City = San Francisco                  | (1)                   | (2)                           |
|---------------------------------------|-----------------------|-------------------------------|
| DV = <i>Individual OptOut</i> (Logit) | Main Effect           | Interaction w/ Daily Contacts |
| Shock                                 | -0.678****<br>(0.030) | -0.673****<br>(0.030)         |
| Shock x<br>NumContacts                |                       | -0.138*<br>(0.083)            |
| NumContacts                           | 0.313****<br>(0.020)  | 0.322****<br>(0.021)          |
| Controls                              | Yes                   | Yes                           |
| Observations                          | 132,924               | 132,924                       |

\*p<0.10; \*\*p<0.05; \*\*\*p<0.01;\*\*\*\*p<0.001

| 8 - Jacksonville                          |                       |                               |
|-------------------------------------------|-----------------------|-------------------------------|
| City = Jacksonville                       | (1)                   | (2)                           |
| DV = <i>Individual OptOut</i> (Logit)     | Main Effect           | Interaction w/ Daily Contacts |
| Shock                                     | -0.195****<br>(0.029) | -0.556****<br>(0.035)         |
| Shock x<br>NumContacts                    |                       | 0.225****<br>(0.011)          |
| NumContacts                               | 0.318****<br>(0.007)  | 0.225****<br>(0.008)          |
| Controls                                  | Yes                   | Yes                           |
| Observations                              | 60,526                | 60,526                        |
| *p<0.10; **p<0.05; ***p<0.01; ****p<0.001 |                       |                               |

| 9 - New Orleans                           |                      |                               |
|-------------------------------------------|----------------------|-------------------------------|
| City = New Orleans                        | (1)                  | (2)                           |
| DV = <i>Individual OptOut</i> (Logit)     | Main Effect          | Interaction w/ Daily Contacts |
| Shock                                     | -0.027<br>(0.028)    | -0.409****<br>(0.034)         |
| Shock x<br>NumContacts                    |                      | 0.196****<br>(0.010)          |
| NumContacts                               | 0.545****<br>(0.007) | 0.489****<br>(0.008)          |
| Controls                                  | Yes                  | Yes                           |
| Observations                              | 45,156               | 45,156                        |
| *p<0.10; **p<0.05; ***p<0.01; ****p<0.001 |                      |                               |

| 10 - Omaha                                |                       |                               |
|-------------------------------------------|-----------------------|-------------------------------|
| City = Omaha                              | (1)                   | (2)                           |
| DV = <i>Individual OptOut</i> (Logit)     | Main Effect           | Interaction w/ Daily Contacts |
| Shock                                     | -0.392****<br>(0.028) | -0.628****<br>(0.035)         |
| Shock x<br>NumContacts                    |                       | 0.101****<br>(0.009)          |
| NumContacts                               | 0.335****<br>(0.005)  | 0.283****<br>(0.007)          |
| Controls                                  | Yes                   | Yes                           |
| Observations                              | 48,972                | 48,972                        |
| *p<0.10; **p<0.05; ***p<0.01; ****p<0.001 |                       |                               |

| 11 - NYC                                  |                          |                                            |
|-------------------------------------------|--------------------------|--------------------------------------------|
| City = NYC                                | (1)                      | (2)                                        |
| DV = <i>Individual OptOut</i> (Logit)     | Main Effect<br>(Poisson) | Interaction w/ Daily Contacts<br>(Poisson) |
| Shock                                     | -0.344****<br>(0.027)    | -0.493****<br>(0.028)                      |
| Shock x<br>NumContacts                    |                          | 0.305****<br>(0.015)                       |
| NumContacts                               | 0.373****<br>(0.008)     | 0.312****<br>(0.008)                       |
| Controls                                  | Yes                      | Yes                                        |
| Observations                              | 291,394                  | 291,394                                    |
| *p<0.10; **p<0.05; ***p<0.01; ****p<0.001 |                          |                                            |

| 12 - Pittsburgh                          |                          |                                            |
|------------------------------------------|--------------------------|--------------------------------------------|
| City = Pittsburgh                        | (1)                      | (2)                                        |
| DV = <i>Individual OptOut</i> (Logit)    | Main Effect<br>(Poisson) | Interaction w/ Daily Contacts<br>(Poisson) |
| Shock                                    | -0.457****<br>(0.029)    | -0.576****<br>(0.031)                      |
| Shock x<br>NumContacts                   |                          | 0.151****<br>(0.014)                       |
| NumContacts                              | 0.300****<br>(0.007)     | 0.241****<br>(0.009)                       |
| Controls                                 | Yes                      | Yes                                        |
| Observations                             | 157,516                  | 157,516                                    |
| *p<0.10; **p<0.05; ***p<0.01;****p<0.001 |                          |                                            |

| 13 - Oklahoma City                       |                          |                                            |
|------------------------------------------|--------------------------|--------------------------------------------|
| City = Oklahoma City                     | (1)                      | (2)                                        |
| DV = <i>Individual OptOut</i> (Logit)    | Main Effect<br>(Poisson) | Interaction w/ Daily Contacts<br>(Poisson) |
| Shock                                    | -0.188****<br>(0.027)    | -0.365****<br>(0.030)                      |
| Shock x<br>NumContacts                   |                          | 0.153****<br>(0.011)                       |
| NumContacts                              | 0.262****<br>(0.006)     | 0.193****<br>(0.008)                       |
| Controls                                 | Yes                      | Yes                                        |
| Observations                             | 82,256                   | 82,256                                     |
| *p<0.10; **p<0.05; ***p<0.01;****p<0.001 |                          |                                            |

| 14 - Philadelphia                        |                          |                                            |
|------------------------------------------|--------------------------|--------------------------------------------|
| City = Philadelphia                      | (1)                      | (2)                                        |
| DV = <i>Individual OptOut</i> (Logit)    | Main Effect<br>(Poisson) | Interaction w/ Daily Contacts<br>(Poisson) |
| Shock                                    | -0.476****<br>(0.029)    | -0.500****<br>(0.029)                      |
| Shock x<br>NumContacts                   |                          | 0.141****<br>(0.021)                       |
| NumContacts                              | 0.240****<br>(0.010)     | 0.206****<br>(0.011)                       |
| Controls                                 | Yes                      | Yes                                        |
| Observations                             | 222,918                  | 222,918                                    |
| *p<0.10; **p<0.05; ***p<0.01;****p<0.001 |                          |                                            |

| 15 - Austin                               |                          |                                            |
|-------------------------------------------|--------------------------|--------------------------------------------|
| City = Austin                             | (1)                      | (2)                                        |
| DV = <i>Individual OptOut</i> (Logit)     | Main Effect<br>(Poisson) | Interaction w/ Daily Contacts<br>(Poisson) |
| Shock                                     | -0.312****<br>(0.027)    | -0.542****<br>(0.031)                      |
| Shock x<br>NumContacts                    |                          | 0.172****<br>(0.011)                       |
| NumContacts                               | 0.267****<br>(0.006)     | 0.202****<br>(0.008)                       |
| Controls                                  | Yes                      | Yes                                        |
| Observations                              | 65,190                   | 65,190                                     |
| *p<0.10; **p<0.05; ***p<0.01; ****p<0.001 |                          |                                            |

| 16 - Seattle                              |                          |                                            |
|-------------------------------------------|--------------------------|--------------------------------------------|
| City = Seattle                            | (1)                      | (2)                                        |
| DV = <i>Individual OptOut</i> (Logit)     | Main Effect<br>(Poisson) | Interaction w/ Daily Contacts<br>(Poisson) |
| Shock                                     | -0.469****<br>(0.031)    | -0.494****<br>(0.033)                      |
| Shock x<br>NumContacts                    |                          | 0.034****<br>(0.014)                       |
| NumContacts                               | 0.268****<br>(0.008)     | 0.254****<br>(0.009)                       |
| Controls                                  | Yes                      | Yes                                        |
| Observations                              | 297,542                  | 297,542                                    |
| *p<0.10; **p<0.05; ***p<0.01; ****p<0.001 |                          |                                            |

| 17 - Arlington                            |                          |                                            |
|-------------------------------------------|--------------------------|--------------------------------------------|
| City = Arlington                          | (1)                      | (2)                                        |
| DV = <i>Individual OptOut</i> (Logit)     | Main Effect<br>(Poisson) | Interaction w/ Daily Contacts<br>(Poisson) |
| Shock                                     | -0.215****<br>(0.026)    | -0.799****<br>(0.033)                      |
| Shock x<br>NumContacts                    |                          | 0.250****<br>(0.010)                       |
| NumContacts                               | 0.386****<br>(0.006)     | 0.258****<br>(0.008)                       |
| Controls                                  | Yes                      | Yes                                        |
| Observations                              | 27,772                   | 27,772                                     |
| *p<0.10; **p<0.05; ***p<0.01; ****p<0.001 |                          |                                            |

| 18 - Phoenix                             |                          |                                            |
|------------------------------------------|--------------------------|--------------------------------------------|
| City = Phoenix                           | (1)                      | (2)                                        |
| DV = <i>Individual OptOut</i> (Logit)    | Main Effect<br>(Poisson) | Interaction w/ Daily Contacts<br>(Poisson) |
| Shock                                    | -0.441****<br>(0.030)    | -0.493****<br>(0.033)                      |
| Shock x<br>NumContacts                   |                          | 0.077****<br>(0.015)                       |
| NumContacts                              | 0.245****<br>(0.008)     | 0.218****<br>(0.010)                       |
| Controls                                 | Yes                      | Yes                                        |
| Observations                             | 264,364                  | 264,364                                    |
| *p<0.10; **p<0.05; ***p<0.01;****p<0.001 |                          |                                            |

| 19 - Nashville                           |                          |                                            |
|------------------------------------------|--------------------------|--------------------------------------------|
| City = Nashville                         | (1)                      | (2)                                        |
| DV = <i>Individual OptOut</i> (Logit)    | Main Effect<br>(Poisson) | Interaction w/ Daily Contacts<br>(Poisson) |
| Shock                                    | -0.264****<br>(0.027)    | -0.406****<br>(0.029)                      |
| Shock x<br>NumContacts                   |                          | 0.203****<br>(0.014)                       |
| NumContacts                              | 0.279****<br>(0.007)     | 0.222****<br>(0.009)                       |
| Controls                                 | Yes                      | Yes                                        |
| Observations                             | 58,512                   | 58,512                                     |
| *p<0.10; **p<0.05; ***p<0.01;****p<0.001 |                          |                                            |

| 20 - Wichita                             |                          |                                            |
|------------------------------------------|--------------------------|--------------------------------------------|
| City = Wichita                           | (1)                      | (2)                                        |
| DV = <i>Individual OptOut</i> (Logit)    | Main Effect<br>(Poisson) | Interaction w/ Daily Contacts<br>(Poisson) |
| Shock                                    | -0.239****<br>(0.027)    | -0.474****<br>(0.039)                      |
| Shock x<br>NumContacts                   |                          | 0.076****<br>(0.009)                       |
| NumContacts                              | 0.252****<br>(0.006)     | 0.214****<br>(0.007)                       |
| Controls                                 | Yes                      | Yes                                        |
| Observations                             | 33,072                   | 33,072                                     |
| *p<0.10; **p<0.05; ***p<0.01;****p<0.001 |                          |                                            |

## Appendix H: Heterogeneous Effect of Policy Compliance on Privacy Choice (Without App Usage Controls)

Table H - Heterogeneous Effect of Policy Compliance on Privacy Choice (Without App Usage Controls)

| DV = CBG<br><i>OptOutCount</i><br>(Poisson) | (1)<br>Main Effect<br>(10 Red<br>Cities) | (2)<br>w/ Policy<br>Compliance<br>(10 Red<br>Cities) | (3)<br>Interaction w/<br>Policy<br>Compliance<br>(10 Red<br>Cities) | (4)<br>Main Effect<br>(10 Blue<br>Cities) | (5)<br>w/ Policy<br>Compliance<br>(10 Blue<br>Cities) | (6)<br>Interaction w/<br>Policy<br>Compliance<br>(10 Blue<br>Cities) | (7)<br>Main Effect<br>(20 Cities) | (8)<br>Interaction w/<br>Policy<br>Compliance<br>(20 Cities) | (9)<br>Three-way<br>Interaction<br>(20 Cities) |
|---------------------------------------------|------------------------------------------|------------------------------------------------------|---------------------------------------------------------------------|-------------------------------------------|-------------------------------------------------------|----------------------------------------------------------------------|-----------------------------------|--------------------------------------------------------------|------------------------------------------------|
| Shock                                       | -0.339****<br>(0.019)                    | -0.289****<br>(0.018)                                | -0.62****<br>(0.025)                                                | -0.499****<br>(0.017)                     | -0.427****<br>(0.016)                                 | -0.576****<br>(0.017)                                                | -0.477****<br>(0.012)             | -0.631****<br>(0.015)                                        | -0.471****<br>(0.017)                          |
| NumContacts                                 |                                          | 0.064****<br>(0.007)                                 | 0.003<br>(0.007)                                                    |                                           | 0.027****<br>(0.007)                                  | -0.016**<br>(0.007)                                                  |                                   | -0.009****<br>(0.005)                                        | 0.001****<br>(0.007)                           |
| Shock X                                     |                                          |                                                      | 0.154****<br>(0.008)                                                |                                           |                                                       | 0.216****<br>(0.008)                                                 |                                   | 0.178****<br>(0.006)                                         | 0.133****<br>(0.008)                           |
| NumContacts<br>Shock X Blue                 |                                          |                                                      |                                                                     |                                           |                                                       |                                                                      |                                   |                                                              | -0.301****<br>(0.015)                          |
| NumContacts<br>X Blue                       |                                          |                                                      |                                                                     |                                           |                                                       |                                                                      |                                   |                                                              | 0.003<br>(0.011)                               |
| Shock X                                     |                                          |                                                      |                                                                     |                                           |                                                       |                                                                      |                                   |                                                              | 0.082****<br>(0.012)                           |
| NumContacts<br>X Blue                       |                                          |                                                      |                                                                     |                                           |                                                       |                                                                      |                                   |                                                              |                                                |
| Controls                                    | ✓                                        | ✓                                                    | ✓                                                                   | ✓                                         | ✓                                                     | ✓                                                                    | ✓                                 | ✓                                                            | ✓                                              |
| CBG FE                                      | ✓                                        | ✓                                                    | ✓                                                                   | ✓                                         | ✓                                                     | ✓                                                                    | ✓                                 | ✓                                                            | ✓                                              |
| # Obs.                                      | 595,084                                  | 595,084                                              | 595,084                                                             | 1,136,214                                 | 1,136,214                                             | 1,136,214                                                            | 1,731,298                         | 1,731,298                                                    | 1,731,298                                      |

\*p<0.10; \*\*p<0.05; \*\*\*p<0.01; \*\*\*\*p<0.001

**Appendix I: Additional Heterogeneity** We explore the additional heterogeneous effects of the psychographics (political ideology) and demographics (income, gender, race) (Equation (6)). As discussed, political ideology impacts the Americans' attitude toward institutional surveillance: with Republicans (Democrats) displaying a warmer (cooler) response<sup>13</sup>. Also, lower- versus higher-income populations might differ, for instance, in their abilities to protect personal information<sup>14</sup>.

**Demographics.** Table I presents the heterogeneous effects of demographics across the 20 cities. We estimate these effects for each demographic variable separately for ease of interpretation. Additional city-by-city analyses also produce consistent results. Overall, the significant and negative effect of the crisis (*Shock*) is consistent with the earlier model-free evidence and the discovered main effect of the crisis: individuals irrespective of demographic heterogeneities have reduced opt-out after the crisis began. This effect is particularly strong (negative  $Shock \times Demographics$ ) among the CBGs with higher proportions of the most affluent (Income >200k), least affluent (Income <60k), and Asian populations.<sup>15</sup>

Table I - Heterogeneous Effect of Demographics on Opt-out

| DV = CBG <i>OptOutCount</i><br>(Poisson) | (1)<br>Main<br>Effect | (2)<br>Interaction<br>w/ Income | (3)<br>Interaction<br>w/ Gender | (4)<br>Interaction<br>w/ Race | (5)<br>Interaction<br>w/ Pooled |
|------------------------------------------|-----------------------|---------------------------------|---------------------------------|-------------------------------|---------------------------------|
| Shock                                    | -0.326****<br>(0.011) | -0.530****<br>(0.021)           | -0.922***<br>(0.044)            | -0.251***<br>(0.022)          | -0.941***<br>(0.074)            |
| Shock × Income 60-100K                   |                       | 0.796****<br>(0.066)            |                                 |                               | 0.496***<br>(0.088)             |
| Shock × Income 100-150K                  |                       | 0.400***<br>(0.068)             |                                 |                               | -0.048<br>(0.087)               |
| Shock × Income 150-200K                  |                       | 0.369***<br>(0.110)             |                                 |                               | 0.297*<br>(0.136)               |
| Shock × Income >200K                     |                       | -0.908****<br>(0.074)           |                                 |                               | -0.361***<br>(0.099)            |
| Shock × Female                           |                       |                                 | 1.175***<br>(0.082)             |                               | 1.176***<br>(0.123)             |
| Shock × Race Black                       |                       |                                 |                                 | -0.159***<br>(0.035)          | -0.195***<br>(0.041)            |
| Shock × Race Asian                       |                       |                                 |                                 | -1.570***<br>(0.095)          | -1.457***<br>(0.094)            |
| Shock × Race Native                      |                       |                                 |                                 | 0.346*<br>(0.148)             | 0.454**<br>(0.156)              |
| Shock × Race Other                       |                       |                                 |                                 | 0.476*<br>(0.222)             | 0.376<br>(0.223)                |
| Controls                                 | ✓                     | ✓                               | ✓                               | ✓                             | ✓                               |
| CBG FEs                                  | ✓                     | ✓                               | ✓                               | ✓                             | ✓                               |
| Log likelihood                           | -553647.35            | -552826.27                      | -553429.17                      | -552691.92                    | -200093.99                      |
| # Obs.                                   | 1,731,298             | 1,731,298                       | 1,731,298                       | 1,731,298                     | 1,731,298                       |

\* p < 0.10, \*\* p < 0.05, \*\*\* p < 0.01, \*\*\*\* p < 0.001.  
Controls are same as those in Table 5.

## Appendix J: Alternative Model Specifications

Table J - Main Effect Using CBG-level Linear Probability Model

|          | Main Effect           |
|----------|-----------------------|
| Shock    | -0.090****<br>(0.002) |
| # Obs.   | 1,731,298             |
| Controls | ✓                     |
| CBG FEs  | ✓                     |

\*p<0.10; \*\*p<0.05; \*\*\*p<0.01; \*\*\*\*p<0.001

**Appendix K: Main Effect Using Only Individuals Who Opted in Since Jan. 1**

| DV = <i>Individual OptOut</i> (Logit)     | Effect<br>(All 20 Cities) |
|-------------------------------------------|---------------------------|
| Shock                                     | -0.040***<br>(0.014)      |
| # Obs.                                    | 408,557                   |
| Controls                                  | ✓                         |
| *p<0.10; **p<0.05; ***p<0.01; ****p<0.001 |                           |

## Appendix L: Falsification Test: Alternative shock Dates

| Falsification Test: Alternative Shock Dates |                    |                   |                    |                   |
|---------------------------------------------|--------------------|-------------------|--------------------|-------------------|
| DV = CBG <i>OptOutCount</i><br>(Poisson)    | Shock<br>Jan. 17   | Shock<br>Jan. 24  | Shock<br>Feb. 14   | Shock<br>Feb. 28  |
| Shock                                       | 0.069*<br>(-0.040) | 0.051<br>(-0.033) | -0.006<br>(-0.026) | 0.038<br>(-0.024) |
| Controls                                    | ✓                  | ✓                 | ✓                  | ✓                 |
| Log likelihood                              | -48213.46          | -48213.73         | -48214.89          | -48213.72         |
| # Obs.                                      | 84,270             | 84,270            | 84,270             | 84,270            |

\* p < 0.10, \*\* p < 0.05, \*\*\* p < 0.01, \*\*\*\* p < 0.001.  
Controls are same as those in Table 5.

| Falsification Test: Alternative Shock Dates (Two Weeks Pre-Shock, D. C. Sample) |                   |                  |                  |                  |                     |                     |
|---------------------------------------------------------------------------------|-------------------|------------------|------------------|------------------|---------------------|---------------------|
| DV = <i>Individual OptOut</i><br>(Logit)                                        | Mar. 1            | Mar. 2           | Mar. 3           | Mar. 4           | Mar. 5              | Mar. 6              |
| Shock                                                                           | -0.010<br>(0.014) | 0.008<br>(0.013) | 0.015<br>(0.013) | 0.025<br>(0.013) | 0.035***<br>(0.014) | 0.037***<br>(0.014) |
| Log likelihood                                                                  | -669224.3         | -669224.6        | -669223.3        | -669220.2        | -669215.7           | -669214.7           |
| Controls                                                                        | ✓                 | ✓                | ✓                | ✓                | ✓                   | ✓                   |
| Individual FEs                                                                  | ✓                 | ✓                | ✓                | ✓                | ✓                   | ✓                   |
| # Obs.                                                                          | 1,395,904         | 1,395,904        | 1,395,904        | 1,395,904        | 1,395,904           | 1,395,904           |

\* p < 0.10, \*\* p < 0.05, \*\*\* p < 0.01, \*\*\*\* p < 0.001.

| DV = <i>Individual OptOut</i><br>(Logit) | Mar. 7              | Mar. 8              | Mar. 9              | Mar. 10          | Mar. 11          | Mar. 12          |
|------------------------------------------|---------------------|---------------------|---------------------|------------------|------------------|------------------|
| Shock                                    | 0.044***<br>(0.014) | 0.042***<br>(0.014) | 0.039***<br>(0.014) | 0.027<br>(0.014) | 0.013<br>(0.015) | 0.001<br>(0.015) |
| Log likelihood                           | -669211.1           | -669212.8           | -669215.4           | -669220.8        | -669224.2        | -669225.1        |
| Controls                                 | ✓                   | ✓                   | ✓                   | ✓                | ✓                | ✓                |
| Individual FEs                           | ✓                   | ✓                   | ✓                   | ✓                | ✓                | ✓                |
| # Obs.                                   | 1,395,904           | 1,395,904           | 1,395,904           | 1,395,904        | 1,395,904        | 1,395,904        |

\* p < 0.10, \*\* p < 0.05, \*\*\* p < 0.01, \*\*\*\* p < 0.001.

### Appendix M: Demographics of Opt-in and Opt-out Users

|                      | Opt-out users' mean | Opt-in users' mean | Opt-out users' mean before March 13th |
|----------------------|---------------------|--------------------|---------------------------------------|
| Gender (Female)      | 0.489               | 0.503              | 0.485                                 |
| Income (<60K)        | 0.486               | 0.481              | 0.482                                 |
| Income (60-100K)     | 0.215               | 0.231              | 0.211                                 |
| Income (100-150K)    | 0.143               | 0.155              | 0.142                                 |
| Income (150-200K)    | 0.063               | 0.062              | 0.064                                 |
| Income (>200K)       | 0.069               | 0.062              | 0.073                                 |
| Race (White)         | 0.68                | 0.714              | 0.674                                 |
| Race (Black)         | 0.15                | 0.136              | 0.149                                 |
| Race (Asian)         | 0.07                | 0.062              | 0.075                                 |
| Race (Native Indian) | 0.008               | 0.009              | 0.007                                 |

## Online Appendix

**Self-reported societal considerations.** The third metric of societal considerations is the individuals' self-reported tendency for societal considerations, collected from a survey among 879 qualified Amazon MTurkers. We acknowledge that the survey-based dataset may not be representative of the whole population and therefore can only provide partial evidence to support the role of prosocial tendencies in reducing opt-outs. Therefore, we do not claim that this survey provides undoubted evidence. Instead, the survey serves to support the main dataset by ruling out alternative explanations, such as time availability, or reduced privacy concerns due to stay-at-home or decreased travel.

This survey examines how individuals' attitude and behavior toward location data sharing have changed since the crisis commenced, and how these changes are related to their self-reported tendency for societal considerations. The survey comprises questions on smartphone usage, awareness of the use of location data to curb the pandemic, societal considerations during the pandemic and in broader contexts, and demographics (details in Online Appendix A). The summary statistics in Online Appendix B reveal that most respondents are aware of the tracking of location data (74.4%) and use of location data to curb the pandemic (81.6%); 48.4% acknowledge that they have become more willing to share location data to help combat the pandemic; 55.1% agree that people need to share location data to help combat the pandemic; a majority agrees that people should wear masks (87.2%), social distance (86.9%), and stay at home (83.6%) during the pandemic; and 36.6% agree that they opted out, changing the location setting from on to off, compared to 50.3% who disagree. These results corroborate with our earlier finding that individuals have opted out less, sharing more location data post-treatment.

We link the opt-out (ordinal *location.on.off*) to each respondent's self-reported societal considerations using both the Ordinal Logit and Ordinary Least Square (OLS) regressions, while controlling for the demographics. The results are consistent. Online Appendix C reveals that those with greater societal considerations, believing in the need to share location data to curb the pandemic (*share.location.prosocial*), wear masks (*wear.masks*), or social distance (*social.distancing*), are significantly less likely to opt out. To explore potential alternative mechanisms, we further link the opt-out (*location.on.off*) to a number of surveyed factors not readily observed in the location data, again using both the Ordinal Logit and OLS regressions. Both produce consistent results (Online Appendix D). We find that those reading privacy policies more carefully (*read.privacy.policies*) are more likely to opt out. The opt-out choice is unrelated to the reduced privacy concern due to increased stay-at-home (*share.location.home*), but more related to individuals' willingness to share location data to help combat the pandemic (*share.location.pandemic*). Overall, these results consistently support the earlier finding that individuals with greater societal considerations opt-out less

during the pandemic. Moreover, our subsequent robustness check confirms a significant association between individuals' societal considerations during the pandemic and such considerations across broader contexts, such as helping others, caring about social issues, or donating to charities (Online Appendix E).

Specifically, 40.9% (45.3%) of the respondents donate to charities (social causes); 72.6% (80.8%) agree that they deeply care about social issues (often help others). We average these responses into one variable (prosocial) and gauge associations with pro-social behavior and belief during the pandemic.

## Online Appendix A: Survey

### EmbeddedData

Random ID = \${rand://int/10000:99999}

Block: Consent Form (6 Questions)  
Standard: Behavioral Questions (3 Questions)  
Standard: Install (3 Questions)  
Standard: Uninstall (3 Questions)  
Standard: Off to On (3 Questions)  
Standard: On to off (3 Questions)  
Standard: General Perception (2 Questions)  
Standard: Pro Social (2 Questions) Standard:  
Tech Savviness (1 Question) Standard:  
Demographics (8 Questions) Standard: Block  
4 (1 Question)  
Block: (0 Questions)

---

#### Start of Block: Consent Form

We are university researchers interested in how your attitude and behavior regarding smartphone location data sharing might have changed since the onset of the COVID-19 pandemic, particularly in the first few months of the pandemic. Thank you for your participation.

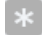

I am aged 18 or older

- Yes (1)  
 No (2)

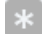

I am a fluent English speaker

- Yes (1)  
 No (2)

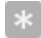

I am a smartphone user

- Yes (1)
- No (2)

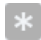

I have read and understood the information above

- Yes (1)
- No (2)

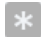

Are you aware that public authorities across the world are using smart phone data to curb the growth of the pandemic? ( Examples : Contact tracing, tracking pandemic spread, opening/re-opening commercial spaces based on mobility )

- Yes (1)
- No (2)

**End of Block: Consent Form**

Break

**Start of Block: Behavioral Questions**

Please rate each of the following statements from 1 = strongly disagree to 5 = strongly agree.

Over the **first few months** of the COVID-19 pandemic

|                                                                                                                | Strongly disagree (6) | Somewhat disagree (7) | Neither agree nor disagree (8) | Somewhat agree (9)    | Strongly agree (10)   |
|----------------------------------------------------------------------------------------------------------------|-----------------------|-----------------------|--------------------------------|-----------------------|-----------------------|
| I have used my smartphone more heavily compared to before the pandemic. (1)                                    | <input type="radio"/> | <input type="radio"/> | <input type="radio"/>          | <input type="radio"/> | <input type="radio"/> |
| I have installed more apps on my smartphone compared to before the pandemic. (2)                               | <input type="radio"/> | <input type="radio"/> | <input type="radio"/>          | <input type="radio"/> | <input type="radio"/> |
| I have used those smartphone apps that require my locations more heavily compared to before the pandemic. (10) | <input type="radio"/> | <input type="radio"/> | <input type="radio"/>          | <input type="radio"/> | <input type="radio"/> |
| I have become more aware that my smartphone collects my location data. (4)                                     | <input type="radio"/> | <input type="radio"/> | <input type="radio"/>          | <input type="radio"/> | <input type="radio"/> |

I have become more aware that location data are used to combat the pandemic. (Examples: Contact tracing, tracking pandemic spread, opening/re-opening commercial spaces based on mobility)  
(11)

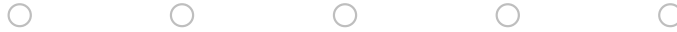

---

Page Break

Over the **first few months** of the pandemic

|                                                                                                                                                                   | Strongly disagree (32) | Somewhat disagree (33) | Neither agree nor disagree (34) | Somewhat agree (35)   | Strongly agree (36)   |
|-------------------------------------------------------------------------------------------------------------------------------------------------------------------|------------------------|------------------------|---------------------------------|-----------------------|-----------------------|
| I have spent more time or become more careful reading the privacy policies before granting smartphone apps permission to collect my location data. (1)            | <input type="radio"/>  | <input type="radio"/>  | <input type="radio"/>           | <input type="radio"/> | <input type="radio"/> |
| I have become more willing to grant mobile apps permission to collect my location data, because I believe sharing location data can help combat the pandemic. (5) | <input type="radio"/>  | <input type="radio"/>  | <input type="radio"/>           | <input type="radio"/> | <input type="radio"/> |
| I have become more willing to grant mobile apps permission to collect my location data, because I stayed home most of the time and did not care about my          | <input type="radio"/>  | <input type="radio"/>  | <input type="radio"/>           | <input type="radio"/> | <input type="radio"/> |

location data  
being  
collected as  
much. (2)

---

End of Block: Behavioral Questions

---

Start of Block: Install

During the pandemic,

|                                                              | Strongly disagree (18) | Somewhat disagree (19) | Neither agree nor disagree (20) | Somewhat agree (21)   | Strongly agree (22)   |
|--------------------------------------------------------------|------------------------|------------------------|---------------------------------|-----------------------|-----------------------|
| I have installed new apps that require location sharing. (1) | <input type="radio"/>  | <input type="radio"/>  | <input type="radio"/>           | <input type="radio"/> | <input type="radio"/> |

---

If so, for what application categories (Example : Games, Music, Online delivery). Enter NA if not applicable.

---

---

Provide a short reason (optional)

---

---

End of Block: Install

---

Start of Block: Uninstall

During the pandemic,

|                                                             | Strongly disagree (20) | Somewhat disagree (21) | Neither agree nor disagree (22) | Somewhat agree (23)   | Strongly agree (24)   |
|-------------------------------------------------------------|------------------------|------------------------|---------------------------------|-----------------------|-----------------------|
| I have uninstalled apps that required location sharing. (1) | <input type="radio"/>  | <input type="radio"/>  | <input type="radio"/>           | <input type="radio"/> | <input type="radio"/> |

If so, for what application categories (Example : Games, Music, Online delivery). Enter NA if not applicable.

---

Provide a short reason (optional)

---

End of Block: Uninstall

Start of Block: Off to On

During the pandemic,

|                                                                                                                       | Strongly disagree (20) | Somewhat disagree (21) | Neither agree nor disagree (22) | Somewhat agree (23)   | Strongly agree (24)   |
|-----------------------------------------------------------------------------------------------------------------------|------------------------|------------------------|---------------------------------|-----------------------|-----------------------|
| I have switched "location data sharing" from "Off" to "On" at least once for at least one mobile app on my phone. (1) | <input type="radio"/>  | <input type="radio"/>  | <input type="radio"/>           | <input type="radio"/> | <input type="radio"/> |

---

If so, for what application categories (Example : Games, Music, Online delivery). Enter NA if not applicable.

---

---

Provide a short reason (optional)

---

End of Block: Off to On

Start of Block: On to off

During the pandemic,

|                                                                                                                       | Strongly disagree (20) | Somewhat disagree (21) | Neither agree nor disagree (22) | Somewhat agree (23)   | Strongly agree (24)   |
|-----------------------------------------------------------------------------------------------------------------------|------------------------|------------------------|---------------------------------|-----------------------|-----------------------|
| I have switched "location data sharing" from "On" to "Off" at least once for at least one mobile app on my phone. (1) | <input type="radio"/>  | <input type="radio"/>  | <input type="radio"/>           | <input type="radio"/> | <input type="radio"/> |

---

If so, for what application categories (Example : Games, Music, Online delivery). Enter NA if not applicable.

---

Provide a short reason (optional)

---

End of Block: On to off

---

Start of Block: General Perception

Please rate each of the following statements from 1 = strongly disagree to 5 = strongly agree.

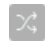

During a pandemic,

|                                                                                                                                   | Strongly disagree (6) | Somewhat disagree (7) | Neither agree nor disagree (8) | Somewhat agree (9)    | Strongly agree (10)   |
|-----------------------------------------------------------------------------------------------------------------------------------|-----------------------|-----------------------|--------------------------------|-----------------------|-----------------------|
| People need to share their private information (such as their locations) if it contributes to the greater good of the public. (1) | <input type="radio"/> | <input type="radio"/> | <input type="radio"/>          | <input type="radio"/> | <input type="radio"/> |
| People need to protect themselves and others by wearing masks during the pandemic. (2)                                            | <input type="radio"/> | <input type="radio"/> | <input type="radio"/>          | <input type="radio"/> | <input type="radio"/> |
| People need to protect themselves and others by practicing social distancing during the pandemic. (3)                             | <input type="radio"/> | <input type="radio"/> | <input type="radio"/>          | <input type="radio"/> | <input type="radio"/> |
| People need to protect themselves and others by staying at home more often during the pandemic. (4)                               | <input type="radio"/> | <input type="radio"/> | <input type="radio"/>          | <input type="radio"/> | <input type="radio"/> |
| Please go ahead and select Somewhat agree for this question (5)                                                                   | <input type="radio"/> | <input type="radio"/> | <input type="radio"/>          | <input type="radio"/> | <input type="radio"/> |

**End of Block: General Perception**

**Start of Block: Pro Social**

Please rate your preference levels for the activities listed below.

|                               | Do not prefer<br>(28) | Prefer slightly<br>(29) | Prefer a moderate<br>amount (30) | Prefer a lot<br>(31)  | Prefer a great<br>deal (32) |
|-------------------------------|-----------------------|-------------------------|----------------------------------|-----------------------|-----------------------------|
| Donation to charities (1)     | <input type="radio"/> | <input type="radio"/>   | <input type="radio"/>            | <input type="radio"/> | <input type="radio"/>       |
| Donation to social causes (2) | <input type="radio"/> | <input type="radio"/>   | <input type="radio"/>            | <input type="radio"/> | <input type="radio"/>       |

Please rate each of the following statements from 1 = strongly disagree to 5 = strongly agree.

|                                       | Strongly disagree (9) | Somewhat disagree (10) | Neither agree nor disagree (11) | Somewhat agree (12)   | Strongly agree (13)   |
|---------------------------------------|-----------------------|------------------------|---------------------------------|-----------------------|-----------------------|
| I often help others (1)               | <input type="radio"/> | <input type="radio"/>  | <input type="radio"/>           | <input type="radio"/> | <input type="radio"/> |
| I deeply care about social issues (2) | <input type="radio"/> | <input type="radio"/>  | <input type="radio"/>           | <input type="radio"/> | <input type="radio"/> |

**End of Block: Pro Social**

**Start of Block: Tech Savviness**

Please rate your knowledge levels for the activities listed below

|                                                      | Extremely knowledgeable<br>(16) | Very knowledgeable<br>(17) | Moderately knowledgeable<br>(18) | Slightly knowledgeable<br>(19) | Not knowledgeable at all<br>(20) |
|------------------------------------------------------|---------------------------------|----------------------------|----------------------------------|--------------------------------|----------------------------------|
| Opting out of location sharing on my smart phone (1) | <input type="radio"/>           | <input type="radio"/>      | <input type="radio"/>            | <input type="radio"/>          | <input type="radio"/>            |
| Clearing cookies on my browser and smart devices (2) | <input type="radio"/>           | <input type="radio"/>      | <input type="radio"/>            | <input type="radio"/>          | <input type="radio"/>            |

End of Block: Tech Savviness

---

Start of Block: Demographics

Your gender

- Male (1)
  - Female (2)
  - Non-binary / third gender (3)
  - Prefer not to say (4)
  - Other, please enter (5) \_\_\_\_\_
-

## Your age

- 18 - 24 (1)
  - 25 - 34 (2)
  - 35 - 44 (3)
  - 45 - 54 (4)
  - 55 - 64 (5)
  - 65 - 74 (6)
  - 75 - 84 (7)
  - 85 or older (8)
- 

## Your ethnicity

- White (8)
  - Black or African American (9)
  - American Indian or Alaska Native (10)
  - Asian (11)
  - Native Hawaiian or Pacific Islander (12)
  - Hispanic (14)
  - Other (13)
- 

In which state do you currently reside?

---

---

What's the highest level of education that you have received?

- Less than high school (1)
  - High school graduate (2)
  - Some college (3)
  - 2 year degree (4)
  - 4 year degree (5)
  - Professional degree (6)
  - Doctorate (7)
-

What is your annual household income before tax?

- Less than \$10,000 (1)
  - \$10,000 - \$19,999 (2)
  - \$20,000 - \$29,999 (3)
  - \$30,000 - \$39,999 (4)
  - \$40,000 - \$49,999 (5)
  - \$50,000 - \$59,999 (6)
  - \$60,000 - \$69,999 (7)
  - \$70,000 - \$79,999 (8)
  - \$80,000 - \$89,999 (9)
  - \$90,000 - \$99,999 (10)
  - \$100,000 - \$149,999 (11)
  - More than \$150,000 (12)
- 

What type of smartphone do you have?

- Android (1)
  - Apple (2)
  - Others, please specify (3) \_\_\_\_\_
-

Are you an essential worker during the pandemic (i.e., workers who conduct operations and services that are essential for critical infrastructure operations, e.g., healthcare, food service, public transportation)

Yes (1)

No (2)

End of Block: Demographics

---

Start of Block: Block 4

Here is your Random ID for completion of the survey text : `#{e://Field/Random%20ID}`

Copy this value to paste it into MTurk.

When you have copied this ID, please click next to submit your survey.

Thanks for your participation!

---

End of Block: Block

| Variable                                | Survey Question                                                                                | Strongly Or Somewhat Agree | Neither Agree Nor Disagree | Somewhat Or Strongly Disagree |
|-----------------------------------------|------------------------------------------------------------------------------------------------|----------------------------|----------------------------|-------------------------------|
| Mobile Usage                            | Used mobile more heavily during pandemic                                                       | 71.5                       | 14.2                       | 14.3                          |
|                                         | Installed more mobile applications during pandemic                                             | 57.7                       | 12.9                       | 29.4                          |
|                                         | Used apps that require locations more heavily                                                  | 52.7                       | 18.3                       | 29                            |
| Awareness                               | Location data being used to curb the growth of pandemic                                        | 81.6                       | 10.0                       | 8.4                           |
|                                         | Smartphones collect location data                                                              | 74.4                       | 15.4                       | 10.2                          |
| Behavior toward Societal Considerations | They are more willing to share location data to help combat pandemic (share.location.pandemic) | 48.4                       | 20.8                       | 30.8                          |
| Tendency for societal considerations    | People need to share location data to help combat the pandemic (share.location.prosocial)      | 55.1                       | 19.6                       | 25.3                          |
|                                         | People need to wear masks (wear.masks)                                                         | 87.2                       | 8.3                        | 4.5                           |
|                                         | People need to social distance (social.distancing)                                             | 86.9                       | 8.3                        | 4.8                           |
|                                         | People need to stay at home (stay.at.home)                                                     | 83.6                       | 11.0                       | 5.4                           |
| Location Data Sharing                   | Changed location settings from ON to OFF (location.on.off)                                     | 36.6                       | 13.1                       | 50.3                          |

### Online Appendix B: Survey Summary Statistics (% of 879 respondents)

### Online Appendix C: Heterogeneous Treatment Effect of Self-reported Societal Considerations on Privacy Choice

| DV = location.on.off (OLS) | (1)                     | (2)                     | (3)                     | (4)                     |
|----------------------------|-------------------------|-------------------------|-------------------------|-------------------------|
| social.distancing          | -0.189***<br>(0.059)    | -0.280***<br>(0.083)    | -0.246***<br>(0.091)    | -0.252***<br>(0.091)    |
| wear.masks                 |                         | 0.127<br>(0.082)        | 0.154*<br>(0.087)       | 0.169*<br>(0.087)       |
| stay.at.home               |                         |                         | -0.072<br>(0.079)       | -0.051<br>(0.080)       |
| share.location.prosocial   |                         |                         |                         | -0.085**<br>(0.043)     |
| Controls                   | ✓                       | ✓                       | ✓                       | ✓                       |
| # Obs.                     | 879                     | 879                     | 879                     | 879                     |
| R <sup>2</sup>             | 0.094                   | 0.097                   | 0.098                   | 0.102                   |
| Adjusted R <sup>2</sup>    | 0.057                   | 0.058                   | 0.058                   | 0.061                   |
| Residual Std. Error        | 1.469 (df = 843)        | 1.467 (df = 842)        | 1.468 (df = 841)        | 1.465 (df = 840)        |
| F Statistic                | 2.502*** (df = 35; 843) | 2.504*** (df = 36; 842) | 2.458*** (df = 37; 841) | 2.507*** (df = 38; 840) |

\*p<0.1; \*\*p<0.05; \*\*\*p<0.01.  
 Controls include age, gender, ethnicity, education, income, and whether essential worker.

**Online Appendix D: Impact of Alternative Factors on Privacy Choice**

| DV = location.on.off (OLS) | (1)                     | (2)                     | (3)                     |
|----------------------------|-------------------------|-------------------------|-------------------------|
| read.privacy.policies      | 0.171***<br>(0.044)     | 0.186***<br>(0.045)     | 0.190***<br>(0.045)     |
| share.location.home        |                         | -0.065<br>(0.042)       | 0.010<br>(0.059)        |
| share.location.pandemic    |                         |                         | -0.105*<br>(0.058)      |
| Controls:                  | ✓                       | ✓                       | ✓                       |
| # Obs.                     | 879                     | 879                     | 879                     |
| R <sup>2</sup>             | 0.099                   | 0.102                   | 0.105                   |
| Adjusted R <sup>2</sup>    | 0.062                   | 0.064                   | 0.066                   |
| Residual Std. Error        | 1.464 (df = 843)        | 1.463 (df = 842)        | 1.461 (df = 841)        |
| F Statistic                | 2.658*** (df = 35; 843) | 2.655*** (df = 36; 842) | 2.678*** (df = 37; 841) |

\*p&lt;0.1; \*\*p&lt;0.05; \*\*\*p&lt;0.01.

Controls include age, gender, ethnicity, education, income, and whether essential worker.

**Online Appendix E: Robustness Checks for the Survey Results**

|                             | (1)                        | (2)                        | (3)                        | (4)                        | (5)                        |
|-----------------------------|----------------------------|----------------------------|----------------------------|----------------------------|----------------------------|
| social.distancing           | 0.167***<br>(0.031)        | 0.042<br>(0.042)           | -0.043<br>(0.046)          | -0.019<br>(0.043)          | -0.019<br>(0.043)          |
| wear.masks                  |                            | 0.176***<br>(0.042)        | 0.108**<br>(0.044)         | 0.081*<br>(0.042)          | 0.075*<br>(0.042)          |
| stay.at.home                |                            |                            | 0.179***<br>(0.040)        | 0.132***<br>(0.038)        | 0.125***<br>(0.038)        |
| share.location.pandemic     |                            |                            |                            | 0.207***<br>(0.020)        | 0.178***<br>(0.024)        |
| share.location.prosocial    |                            |                            |                            |                            | 0.054**<br>(0.024)         |
| Controls<br>(Same as above) | ✓                          | ✓                          | ✓                          | ✓                          | ✓                          |
| Observations                | 876                        | 876                        | 876                        | 876                        | 876                        |
| R <sup>2</sup>              | 0.168                      | 0.185                      | 0.204                      | 0.295                      | 0.299                      |
| Adjusted R <sup>2</sup>     | 0.133                      | 0.150                      | 0.169                      | 0.263                      | 0.267                      |
| Residual Std. Error         | 0.762<br>(df = 840)        | 0.754<br>(df = 839)        | 0.746<br>(df = 838)        | 0.702<br>(df = 837)        | 0.701<br>(df = 836)        |
| F Statistic                 | 4.842***<br>(df = 35; 840) | 5.287***<br>(df = 36; 839) | 5.796***<br>(df = 37; 838) | 9.220***<br>(df = 38; 837) | 9.154***<br>(df = 39; 836) |

\*p<0.10; \*\*p<0.05; \*\*\*p<0.01
